# Supplementary material for: Efficiency enhancement in inverted planar perovskite solar cells by synergetic effect of sulfated graphene oxide (sGO) and PEDOT:PSS as hole transporting layer
Source: Royal Society of Chemistry journal article supplement (doi:10.1039/c7ra10113a), 2017-01-01
Supplement: c7ra10113a1.pdf [file c7ra10113a1.pdf]

# Efficiency enhance in inverted planar perovskite solar cells by synergetic effect of sulfated graphene oxide (sGO) and PEDOT:PSS as hole transporting layer

Heng Guo <sup>a</sup>, Xu Huang <sup>a</sup>, Bingxue Pu <sup>a</sup>, Jian Yang <sup>a</sup>, Haiyuan Chen <sup>a</sup>, Yajun Zhou <sup>a</sup>, Jin Yang <sup>a</sup>, Yulan Li <sup>a</sup>, Zhiming Wang <sup>b</sup>, and Xiaobin Niu <sup>a, b, \*</sup>

<sup>a</sup> Institute of Fundamental & Frontier Science, State Key Laboratory of Electronic Thin Film and Integrated Devices, University of Electronic Science and Technology of China, Chengdu 610054, China

<sup>b</sup> Institute of Fundamental and Frontier Science, University of Electronic Science and Technology of China, Chengdu, 610054, PR China

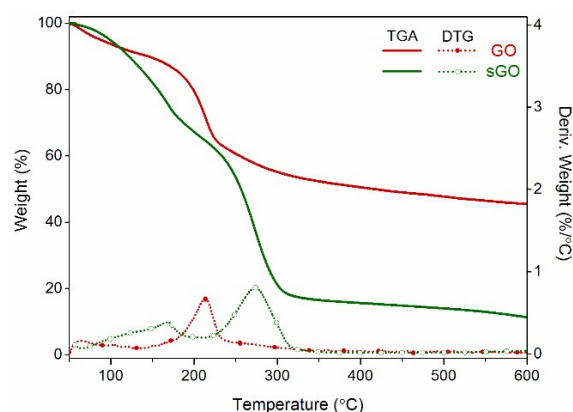

**Fig. S1** TGA and DTG curves of GO and sGO powders.

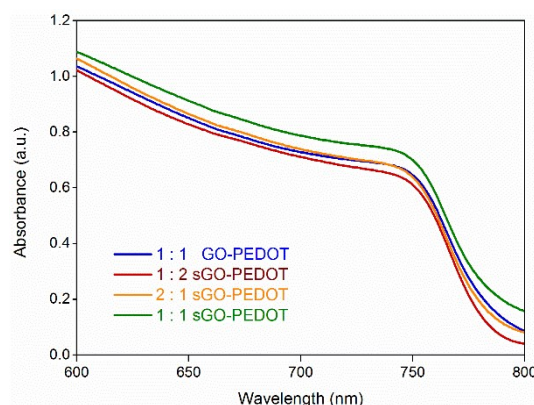

**Fig. S2** UV-vis spectra of CH<sub>3</sub>NH<sub>3</sub>PbI<sub>3</sub> perovskite on different composite HTLs.

\* Corresponding Author E-mail: [xbniu@uestc.edu.cn](mailto:xbniu@uestc.edu.cn) . Tel/Fax: +86-28-83208612.

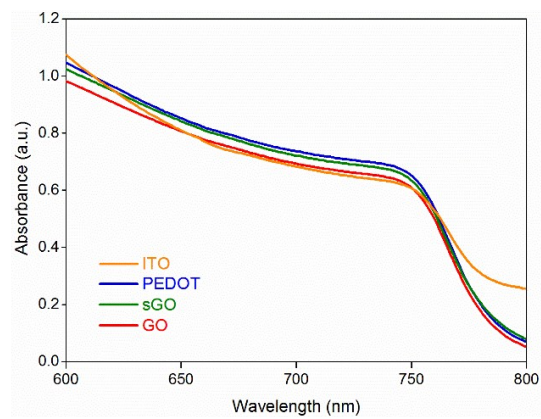

**Fig. S3** UV-vis spectra of  $\text{CH}_3\text{NH}_3\text{PbI}_3$  perovskite on different HTLs.

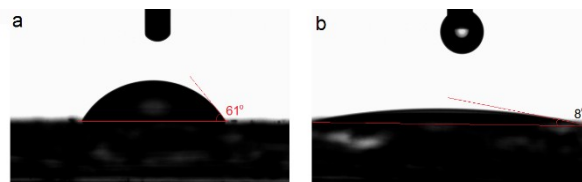

**Fig. S4** Water contact angles of ITO-coated glass without (a) and with (b) 15 min of UV-zone treatments
